# Supplementary material for: The Effect of Breast Milk Microbiota on the Composition of Infant Gut Microbiota: A Cohort Study
Source: MDPI journal article supplement (doi:10.3390/nu14245397), 2022-12-19
Supplement: s1 [file s1]

## Supplementary

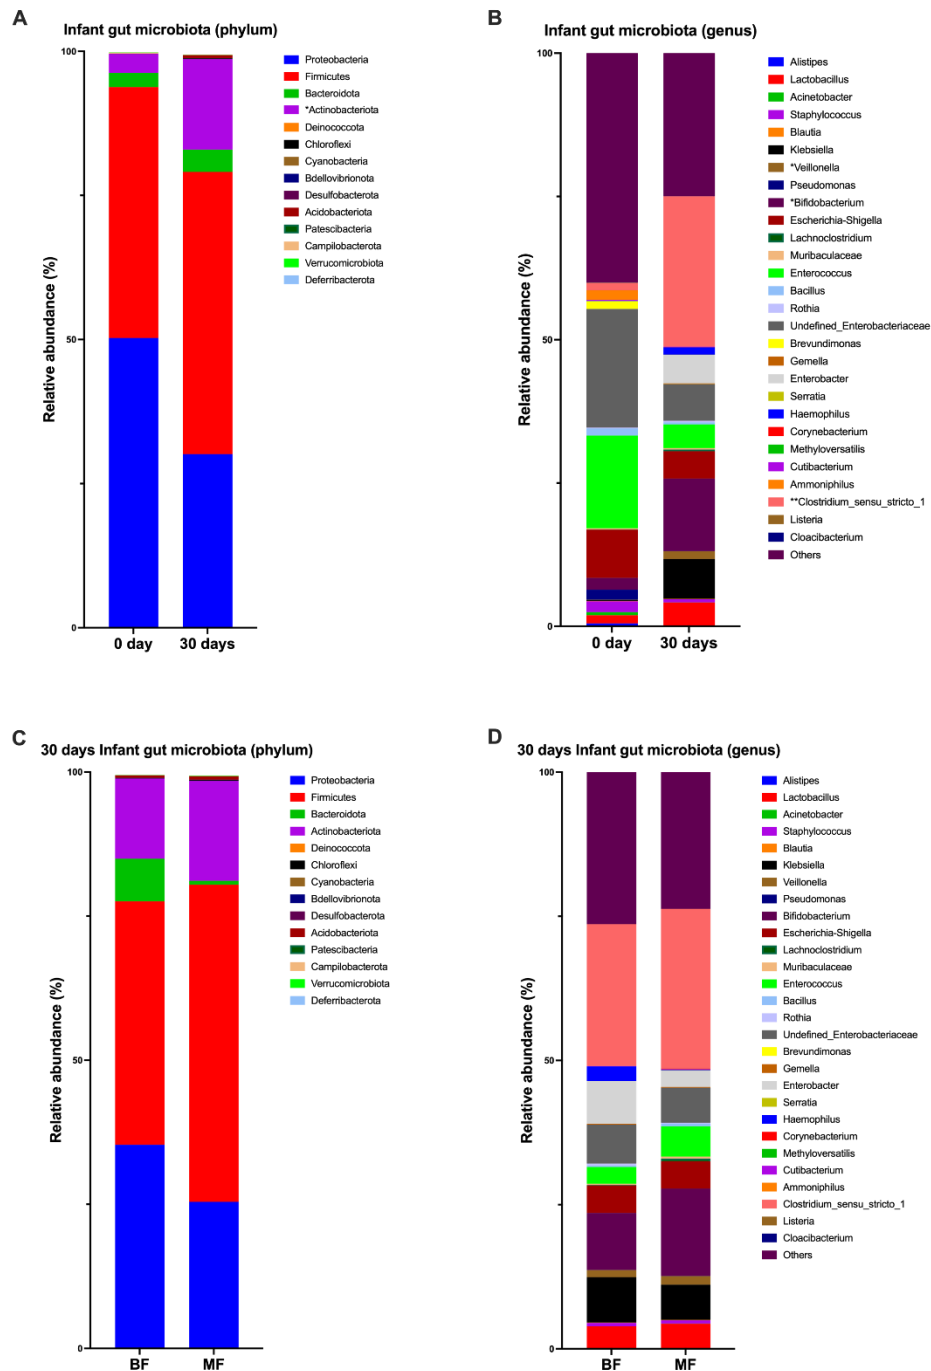

**Figure S1.** Differences in the relative abundance of infant gut microbiota among different periods and subgroups. (0d, n = 6; 30d, n = 19; BF, n = 9; MF, n = 10) (A) Differences in the relative abundance of infant gut microbiota at 0 d and 30 days at the phylum level; (B) Differences in the relative abundance of infant gut microbiota at 0 day and 30 days at the genus level; (C) Differences in the relative abundance of infant gut microbiota at the phylum level on 30 days; (D) Differences in the relative abundance of infant gut microbiota at the genus level on 30days. \*  $p < 0.05$ , \*\*  $p < 0.01$

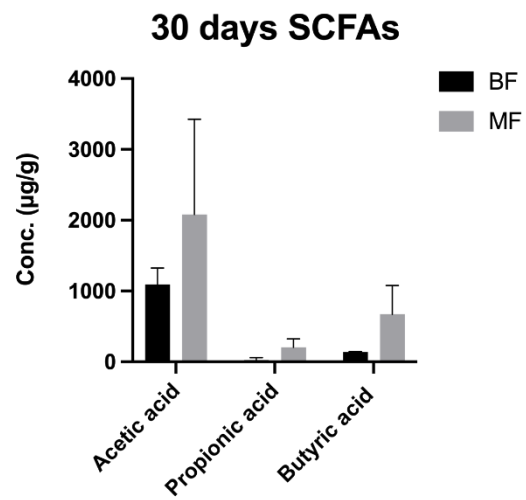

Figure S2. The concentrations of SCFAs on 30 days between BF and MF. (BF, n = 9; MF, n = 10).
